# Supplementary material
Source: MDPI journal article supplement (https://www.mdpi.com/2076-3298/9/7/88)
Supplement: s1 [file s1]

# Impact of Heavy Metals in Eggs and Tissues of *C. caretta* Along the Sicilian Coast (Mediterranean Sea)

Dario Savoca <sup>1,\*</sup>, Marco Arculeo <sup>1</sup>, Vincenzo Arizza <sup>1</sup>, Andrea Pace <sup>1</sup>, Raffaella Melfi <sup>1</sup>, Santo Caracappa <sup>2,3</sup>, Giulia Caracappa <sup>2</sup>, Cecilia Vullo <sup>2</sup>, Irene Cambera <sup>4</sup>, Giulia Visconti <sup>4</sup>, Vittoria Giudice <sup>5</sup>, Gaetano D'Oca <sup>5</sup>, Salvatore Messina <sup>5</sup> and Antonella Maccotta <sup>1</sup>

<sup>1</sup> Dipartimento di Scienze e Tecnologie Biologiche, Chimiche e Farmaceutiche (STEBICEF), Università degli Studi di Palermo, 90100 Palermo, Italy; marco.arculeo@unipa.it (M.A.); vincenzo.arizza@unipa.it (V.A.); andrea.pace@unipa.it (A.P.); raffaella.melfi@unipa.it (R.M.); antonella.maccotta@unipa.it (A.M.)

<sup>2</sup> Ospedale veterinario universitario didattico Università di Messina, Polo Universitario dell'Annunziata, 98168 Messina, Italy; santo.caracappa@unime.it (S.C.); giulia.caracappa@gmail.com (G.C.); c.vullo@unime.it (C.V.)

<sup>3</sup> Dipartimento SAAF, Università degli Studi di Palermo, 90100 Palermo, Italy

<sup>4</sup> Marine Protected Area 'Isole Pelagie', Via Cameroni, 92031 Lampedusa, AG, Italy; irenecambera@gmail.com (I.C.); giulia.visconti@gmail.com (G.V.)

<sup>5</sup> ARPA Sicilia, Agenzia Regionale Protezione Ambiente, UOS L2.2 Divisione Analitica 2 e Centro Riferimento Diossine, via Nairobi, 90129 Palermo, Italy; vgiudice@arpa.sicilia.it (V.G.); gdoca@arpa.sicilia.it (G.D.); smessina@arpa.sicilia.it (S.M.)

\* Correspondence: dario.savoca@unipa.it

**Table S1.** Percentage of recovery, LOD, and LOQ averages for each element.

| Analyte | % Recovery | LOQ (µg/g) | LOD (µg/g) |
|---------|------------|------------|------------|
| Cr      | 95.44      | 0.18       | 0.083      |
| Ni      | 99.15      | 0.22       | 0.088      |
| Cu      | 76.75      | 0.43       | 0.16       |
| As      | 76.47      | 0.01       | 0.003      |
| Se      | 84.97      | 0.03       | 0.01       |
| Cd      | 80.10      | 0.01       | 0.002      |
| Hg      | 103.94     | 0.01       | 0.006      |
| Pb      | 80.89      | 0.17       | 0.06       |
| Co      | 88.66      | 0.01       | 0.001      |
| Mn      | 83.92      | 0.08       | 0.043      |
| Ag      | 82.45      | 0.01       | 0.002      |
| V       | 80.19      | 0.01       | 0.004      |
| Zn      | 80.19      | 44.19      | 17.727     |
| Fe      | 78.90      | 3.39       | 1.373      |
| Sb      | 94.49      | 0.01       | 0.002      |
| Ba      | 79.41      | 1.13       | 0.547      |
| B       | 80.09      | 2.30       | 0.85       |
| Sn      | 78.16      | 0.76       | 0.245      |
